# Supplementary material for: Creating functional groups of marine fish from categorical traits
Source: PeerJ journal article supplement (doi:10.7717/peerj.5795), 2018-10-23
Supplement: Figures_S2.pdf [file Figures_S2.pdf]

1 **FIGURE S2 ALTERNATIVE SOLUTION FOR EVALUATING RELIABILITY US-**  
 2 **ING THE GINI COEFFICIENT**

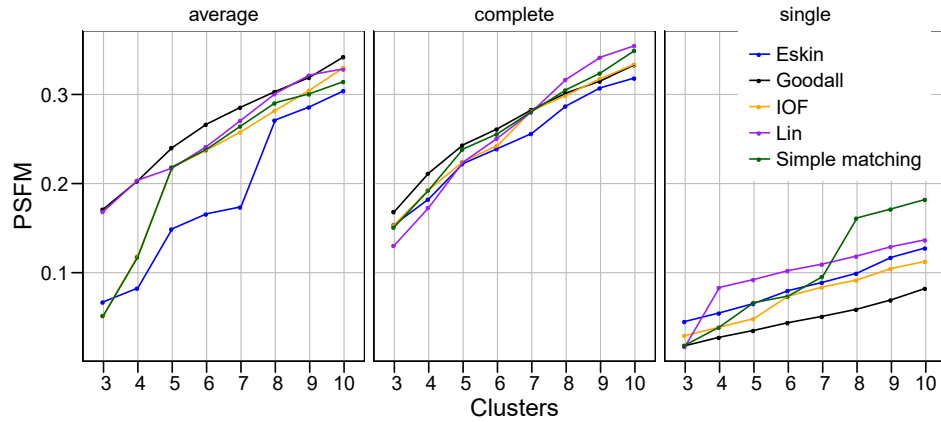

**Figure 1.** Evaluation of the optimal number of clusters using the pseudo F coefficient based on the mutability (PSFM). All 10 distance matrices (coloured lines) from the *nomclust* package are displayed tested across three clustering algorithms (facets).

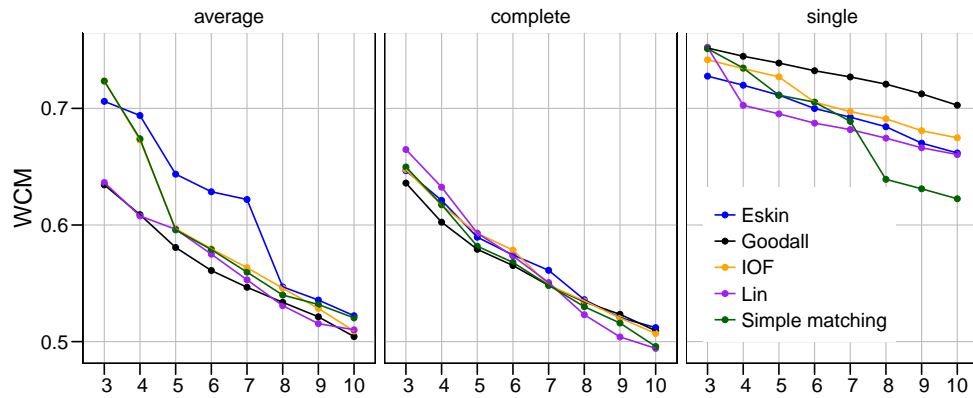

**Figure 2.** Evaluation of the optimal number of clusters using the within-cluster mutability coefficient (WCE). All 10 distance matrices (coloured lines) from the *nomclust* package are displayed tested across three clustering algorithms (facets).
