# Supplementary material for: Creating functional groups of marine fish from categorical traits
Source: PeerJ journal article supplement (doi:10.7717/peerj.5795), 2018-10-23
Supplement: Table_S1.pdf [file Table_S1.pdf]

## TABLE S1 LIST OF THE POSSIBLE TRAITS TO INCLUDE

**Table 1.** List of diet and life history traits to include in clustering

| Trait                      | References                                                        | Measurement type       |
|----------------------------|-------------------------------------------------------------------|------------------------|
| <b>Diet</b>                |                                                                   |                        |
| Primary diet category      | Defined by authors                                                | Categorical - Nominal  |
| Food type/ properties      | Sibbing & Nagelkerke 2000, Reecht et al., 2013                    | Categorical - Nominal  |
| <b>Life History</b>        |                                                                   |                        |
| Number of eggs             | Bremner et al. 2006a, Clavel et al. 2013, Gravel et al. 2016      | Numerical - Integer    |
| Number of spawns per year  | Clavel et al. 2013                                                | Numerical - Integer    |
| Reproductive season        | NEW                                                               | Categorical - Nominal  |
| Parental care              | Franco et al. 2008, Gravel et al. 2016                            | Categorical - Nominal  |
| Reproductive mode          | Bremner et al. 2006a, Elliott et al. 2007, Franco et al. 2008     | Categorical - Nominal  |
| Sexual differentiation     | Bremner et al. 2006a                                              | Categorical - Nominal  |
| Phylogenetic diversity     | Froese & Pauly 2017                                               | Numerical - Integer    |
| Population doubling        | Bremner et al. 2006a, Froese & Pauly 2017                         | Categorical - Nominal  |
| Vulnerability              | Froese & Pauly 2017                                               | Numerical              |
| Gregarious/ Schooling type | Bremner et al. 2006a, Stuart-Smith et al. 2013, Spitz et al. 2014 | Categorical - Nominal  |
| Seasonal migration         | Bremner et al. 2006a, Spitz et al. 2014                           | Categorical - Nominal  |
| Diel migration             | Bremner et al. 2006a, Stuart-Smith et al. 2013, Spitz et al. 2014 | Categorical - Nominal  |
| Ontogenetic migration      | Reum & Essington 2008                                             | Categorical - Nominal  |
| Maximum age                | Bremner et al. 2006a, Clavel et al. 2013, Gravel et al. 2016      | Numerical - Integer    |
| Mortality                  | Froese & Pauly 2017                                               | Numerical - Continuous |
| Age at maturity            | Bremner et al. 2006a, Clavel et al. 2013                          | Numerical - Continuous |
| Length at maturity         | Bremner et al. 2006a, Clavel et al. 2013                          | Numerical - Continuous |

**Table 2.** List of morphological and habitat traits to include in clustering

| Trait                       | References                                                                                                                                                                                        | Measurement type       |
|-----------------------------|---------------------------------------------------------------------------------------------------------------------------------------------------------------------------------------------------|------------------------|
| <b>Morphological traits</b> |                                                                                                                                                                                                   |                        |
| Body length (max)           | Winemiller & Rose 1992, Froese & Binohlan 2000, Sibbing & Nagelkerke 2000, Boyle & Horn 2006, Bremner et al. 2006b, Clavel et al. 2013, Spitz et al. 2014, Gravel et al. 2016, Mindel et al. 2016 | Numerical - Continuous |
| Body mass (max)             | Palomares & Pauly 1989, Dumay et al. 2004, Reece et al. 2013, Spitz et al. 2014, Gravel et al. 2016                                                                                               | Numerical - Continuous |
| Growth rate                 | Bremner et al. 2006b                                                                                                                                                                              | Numerical - Continuous |
| Swimming mode               | Sfakiotakis et al. 1999                                                                                                                                                                           | Categorical - Nominal  |
| Dorsal fin shape            | Standen & Lauder 2005                                                                                                                                                                             | Categorical - Nominal  |
| Caudal fin shape            | Roberts 1987, Bridge et al. 2016, Gravel et al. 2016                                                                                                                                              | Categorical - Nominal  |
| Pelvic fin position         | Lauder & Drucker 2004                                                                                                                                                                             | Categorical - Nominal  |
| Body shape/form             | Webb 1984, Roberts 1987, Spitz et al. 2014, Gravel et al. 2016                                                                                                                                    | Categorical - Nominal  |
| Eye position                | Clavel et al. 2013, Mindel et al. 2016                                                                                                                                                            | Categorical - Nominal  |
| Barbel presence             | Piet 1998, Reece et al. 2013, Gravel et al. 2016                                                                                                                                                  | Categorical - Nominal  |
| Oral gape position          | Roberts 1987, Sibbing & Nagelkerke 2000, Ward-Campbell et al. 2005, Boyle & Horn 2006, Reece et al. 2013, Gravel et al. 2016                                                                      | Categorical - Nominal  |
| Shape of teeth              | Roberts 1987, Gravel et al. 2016                                                                                                                                                                  | Categorical - Nominal  |
| Number of gill rakers       | Sibbing & Nagelkerke 2000, Boyle & Horn 2006                                                                                                                                                      | Numerical - Integer    |
| <b>Habitat</b>              |                                                                                                                                                                                                   |                        |
| Depth found                 | Spitz et al. 2014, Froese & Pauly 2017                                                                                                                                                            | Numerical - Continuous |
| Preferred temperature       | Froese & Pauly 2017                                                                                                                                                                               | Numerical - Integer    |
| Temperature type            | Froese & Pauly 2017                                                                                                                                                                               | Categorical - Nominal  |
| Horizontal habitat          | Spitz et al. 2014                                                                                                                                                                                 | Categorical - Nominal  |
| Vertical habitat            | Sibbing & Nagelkerke 2000, Bremner et al. 2006a, Spitz et al. 2014                                                                                                                                | Categorical - Nominal  |
| Estuarine use               | Elliott et al. 2007, Franco et al. 2008                                                                                                                                                           | Categorical - Nominal  |

## References

- Boyle KS, Horn MH. 2006. Comparison of feeding guild structure and ecomorphology of intertidal fish assemblages from central California and central Chile. *Marine Ecology Progress Series* 319:65-84
- Bremner J, Paramor OAL, Frid CLJ. 2006a. Developing a methodology for incorporating ecological structure and functioning into designation of Special Areas of Conservation (SAC) in the 0-12 nautical mile zone.
- Bremner J, Rogers SI, Frid CLJ. 2006b. Matching biological traits to environmental conditions in marine benthic ecosystems. *Journal of Marine Systems* 60:302-316
- Bridge TCL, Luiz OJ, Coleman RR, Kane CN, Kosaki RK. 2016. Ecological and morphological traits predict depth-generalist fishes on coral reefs. *Proceedings of the Royal Society B* 283:1823

- 12 Clavel J, Poulet N, Porcher E, Blanchet S, Grenouillet G, Pavoine S, Biton A, Seon-Massin N, Argillier  
13 C, Daufresne M, Teillac-Deschamps P, Julliard R. 2013. A new freshwater biodiversity indicator based on  
14 fish community assemblages. *PLoS One* 8:e80968
- 15 Dumay O, Tari PS, Tomasini JA, Mouillot D. 2004. Functional groups of lagoon fish species in  
16 Languedoc Roussillon, southern France. *Journal of Fish Biology* 64:970-983
- 17 Elliott M, Whitfield AK, Potter IC, Blaber SJM, Cyrus DP, Nordlie FG, Harrison TD. 2007. The guild  
18 approach to categorizing estuarine fish assemblages: a global review. *Fish and Fisheries* 8:241-268
- 19 Franco A, Elliott M, Franzoi P, Torricelli P. 2008. Life strategies of fishes in European estuaries: the  
20 functional guild approach. *Marine Ecology Progress Series* 354:219-228
- 21 Froese R, Binohlan C. 2000. Empirical relationships to estimate asymptotic length, length at first  
22 maturity and length at maximum yield per recruit in fishes, with a simple method to evaluate length  
23 frequency data. *Journal of Fish Biology* 56:758-773
- 24 Froese R, Pauly D. 2017. FishBase. Accessed 02-02-2017.
- 25 Gravel D, Albouy C, Thuiller W. 2016. The meaning of functional trait composition of food webs for  
26 ecosystem functioning. *Philosophical Transactions of the Royal Society B* 371:1694
- 27 Lauder GV, Drucker EG. 2004. Morphology and experimental hydrodynamics of fish fin control  
28 surfaces. *IEEE Journal Ocean Engineering* 29:556-571
- 29 Mindel BL, Webb TJ, Neat FC, Blanchard JLZ. 2016. A trait-based metric sheds new light on the  
30 nature of the body size–depth relationship in the deep sea. *Journal of Animal Ecology* 85:427-436
- 31 Palomares ML, Pauly D. 1989. A multiple regression model for prediction the food consumption of  
32 Marine Fish populations. *Marine Freshwater Research* 40:259-273
- 33 Piet GJ. 1998 Ecomorphology of a size-structured tropical freshwater fish community. *Environmental*  
34 *Biology of Fishes* 51:67-86
- 35 Reece Y, Rochet MJ, Trenkel VM, Jennings S, Pinnegar JK. 2013. Use of morphological char-  
36 acteristics to define functional groups of predatory fishes in the Celtic Sea. *Journal of Fish Biology*  
37 83:355-377
- 38 Reum JCP, Essington TE. 2008. Seasonal variation in guild structure of the Puget-Sound demersal  
39 fish community. *Estuaries and Coasts* 31:790-801
- 40 Roberts CD. 1987. First records of demersal fishes from the North Cape three kings area of New  
41 Zealand, with a record of a prespawning aggregation of ling, *Genypterus blacodes* (note). *New Zealand*  
42 *Journal of Marine Freshwater Research* 21:157-161
- 43 Sfakiotakis M, Lane DM, Davies JBC. 1999. Review of fish swimming modes for aquatic locomotion.  
44 *IEEE Journal of Ocean Engineering* 24:237-252
- 45 Sibbing FA, Nagelkerke LAJ. 2000 Resource partitioning by Lake Tana barbs predicted from fish  
46 morphometrics and prey characteristics. *Reviews in Fish Biology and Fisheries* 10:393-437
- 47 Spitz J, Ridoux V, Brind'Amour A. 2014. Let's go beyond taxonomy in diet description: testing a  
48 trait-based approach to prey–predator relationships. *Journal of Animal Ecology* 83:1137-1148
- 49 Standen EM, Lauder GV. 2005. Dorsal and anal fin function in bluegill sunfish *Lepomis macrochirus*  
50 three-dimensional kinematics during propulsion and manoeuvring. *Journal of Experimental Biology*  
51 208:2753-2753
- 52 Stuart-Smith RD, Bates AE, Lefcheck JS, Duffy JE, Baker SC, Thomson RJ, Stuart-Smith JF, Hill  
53 NA, Kininmonth SJ, Airoidi L, Becerro MA, Campbell SJ, Dawson TP, Navarrete SA, Soler GA, Strain  
54 EMA, Willis TJ, Edgar GJ. 2013. Integrating abundance and functional traits reveals new global hotspots  
55 of fish diversity. *Nature* 501:539-542
- 56 Ward-Campbell BMS, Beamish FWH, Kongchaiya C. 2005. Morphological characteristics in relation  
57 to diet in five coexisting Thai fish species. *Journal of Fish Biology* 67:1266-1279
- 58 Webb PW. 1984. Form and function in fish swimming. *Scientific American* 251:72-82
- 59 Winemiller KO, Rose KA. 1992. Patterns of Life-history diversification in North American fishes:  
60 implications for population regulation. *Canadian Journal of Fisheries Aquatic Science* 49:2196-2218
